# Supplementary material
Source: PubMed Central journal article supplement (PMC6600646)

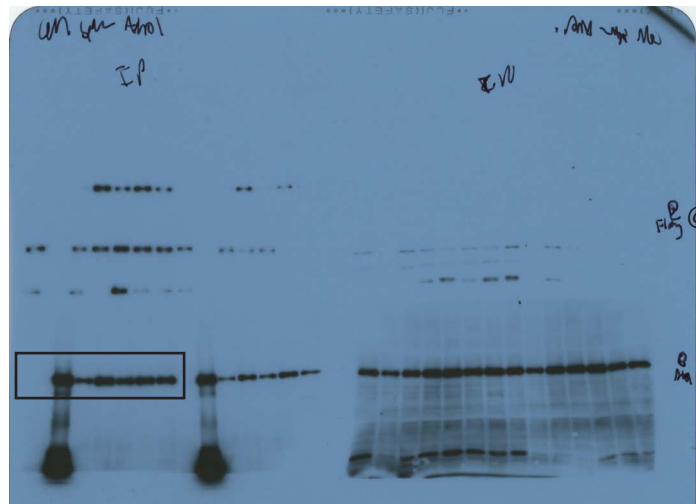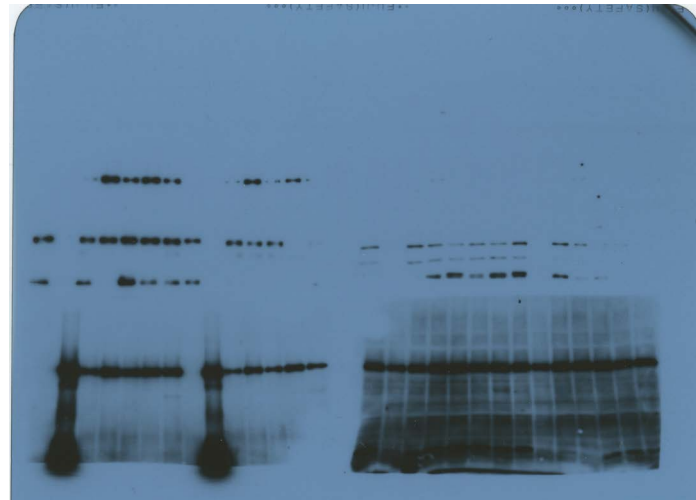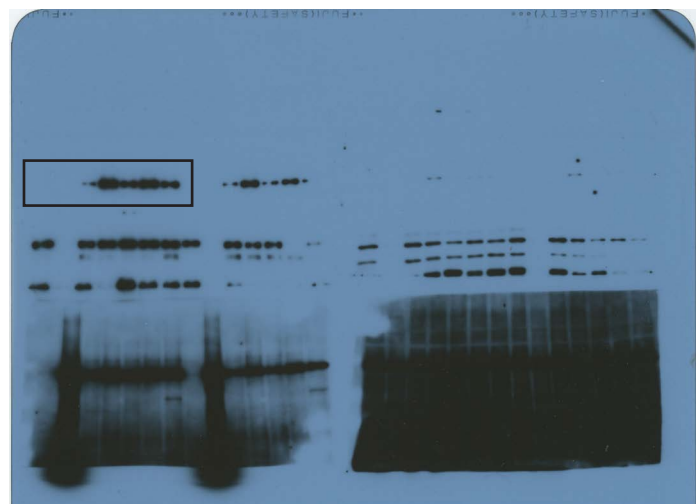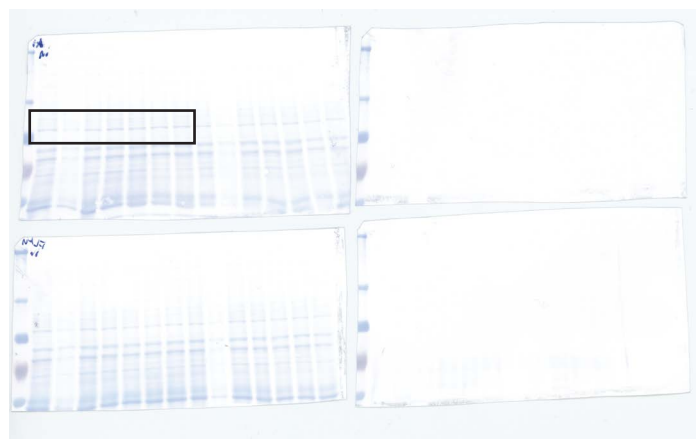

Figure 1 panel C

D

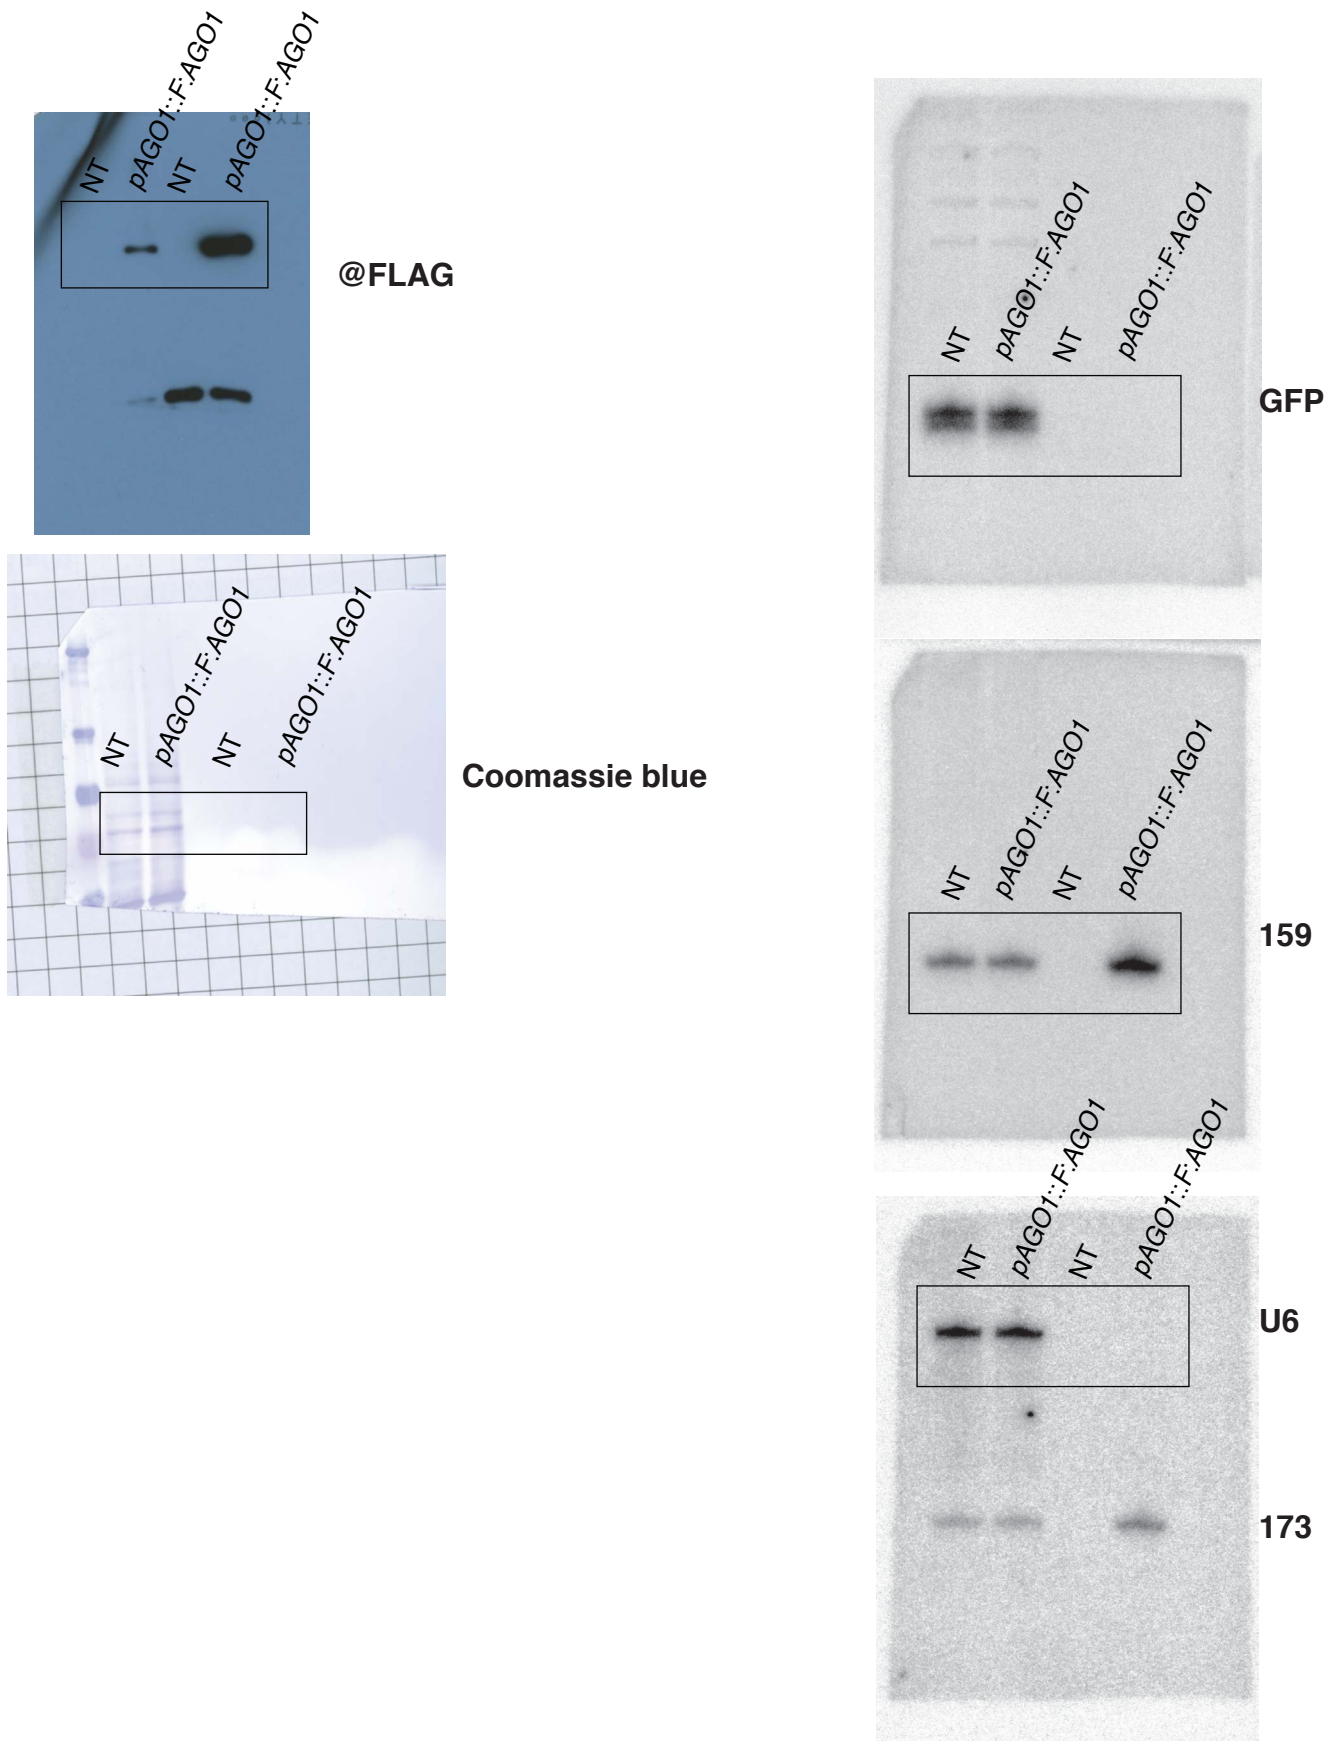

Figure1 panel D

F

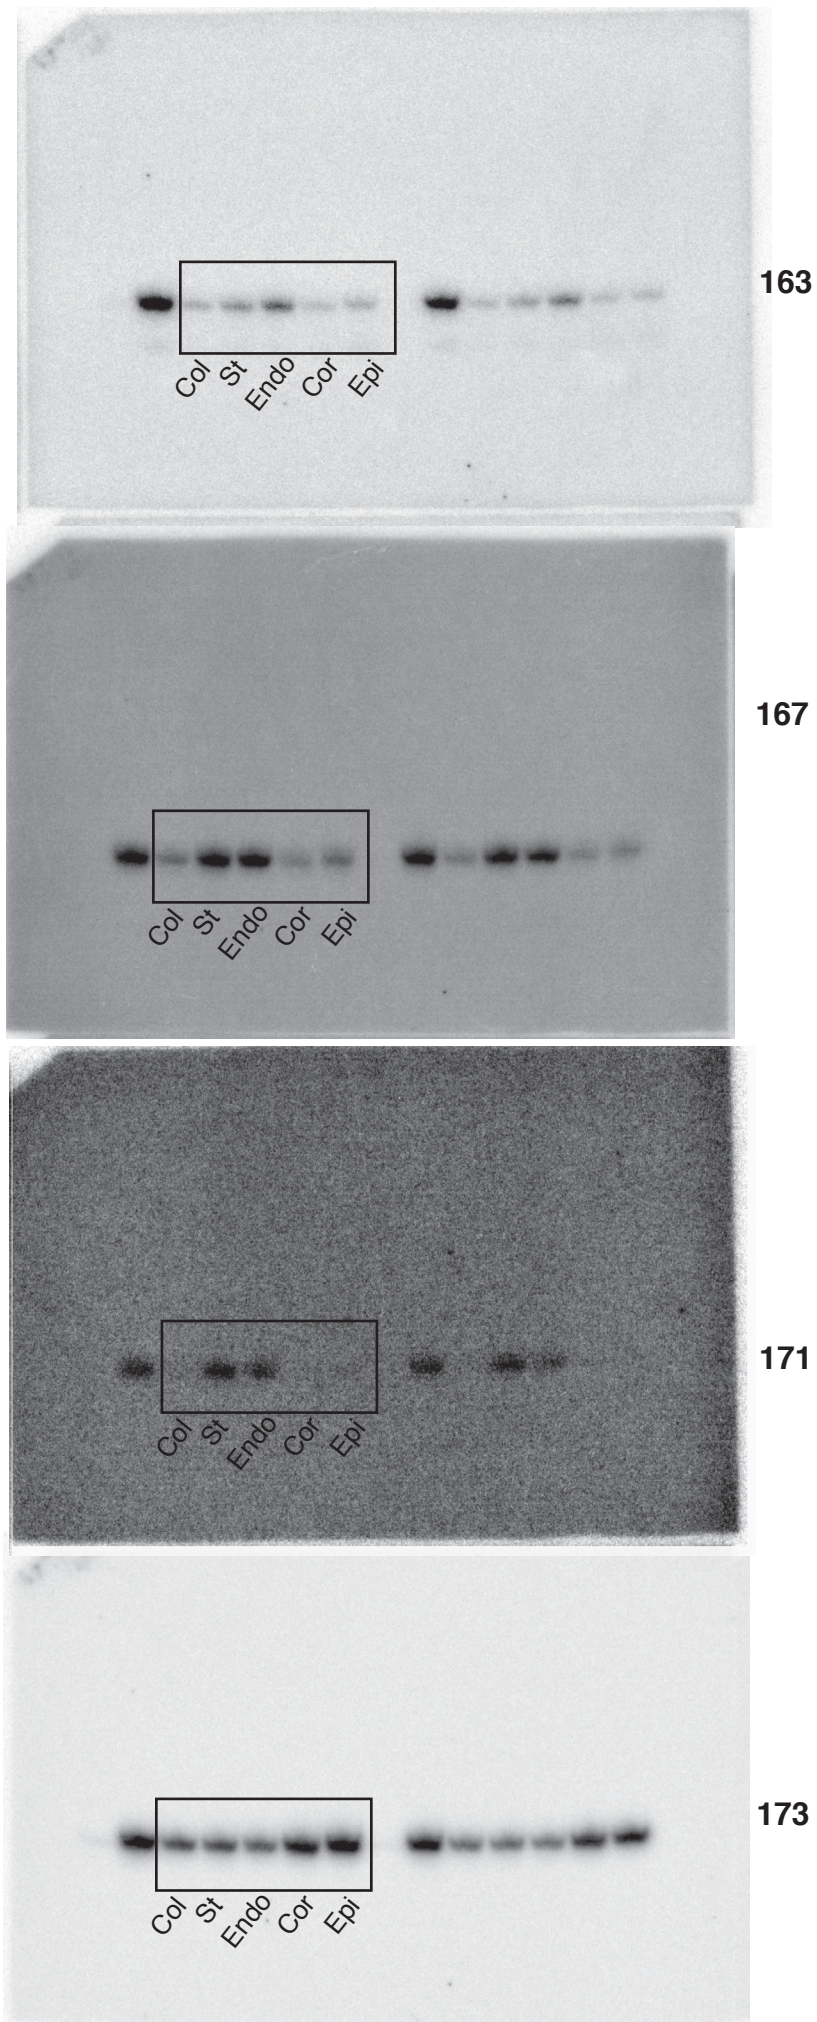

Figure 1 panel F

Supplement: EMBJ-38-e100754-s004.pdf [file EMBJ-38-e100754-s004.pdf]

**B**

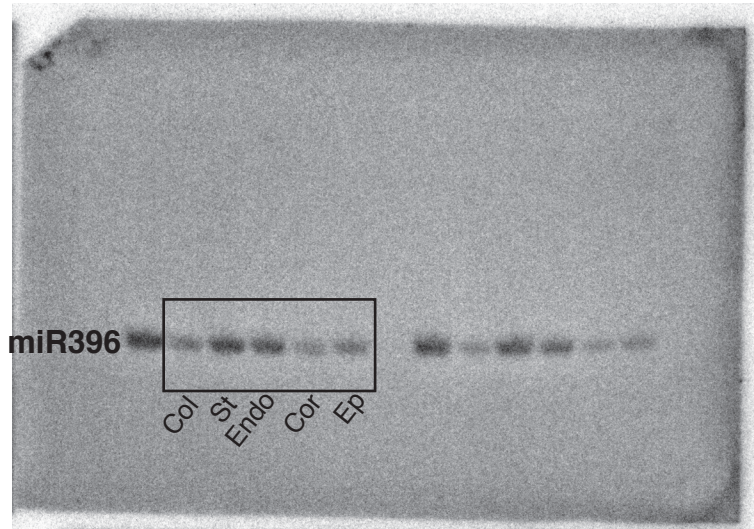

**Figure 4 panel B**

Supplement: EMBJ-38-e100754-s005.pdf [file EMBJ-38-e100754-s005.pdf]

**A**

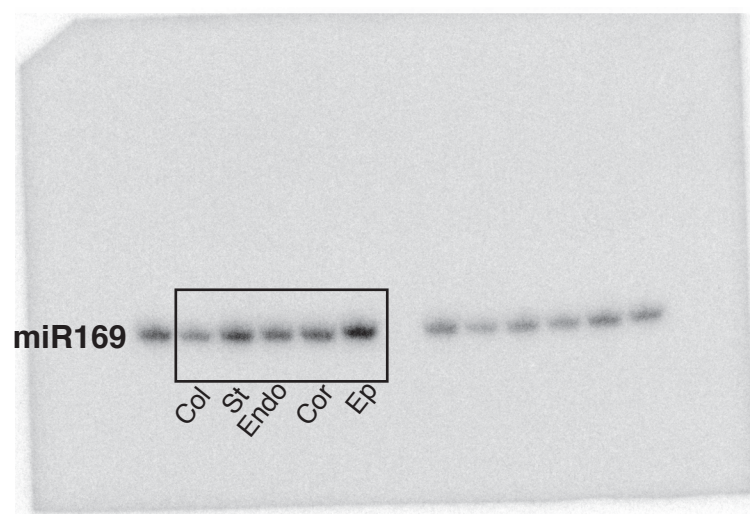

**Figure 5 panel A**

Supplement: EMBJ-38-e100754-s006.pdf [file EMBJ-38-e100754-s006.pdf]

**A**

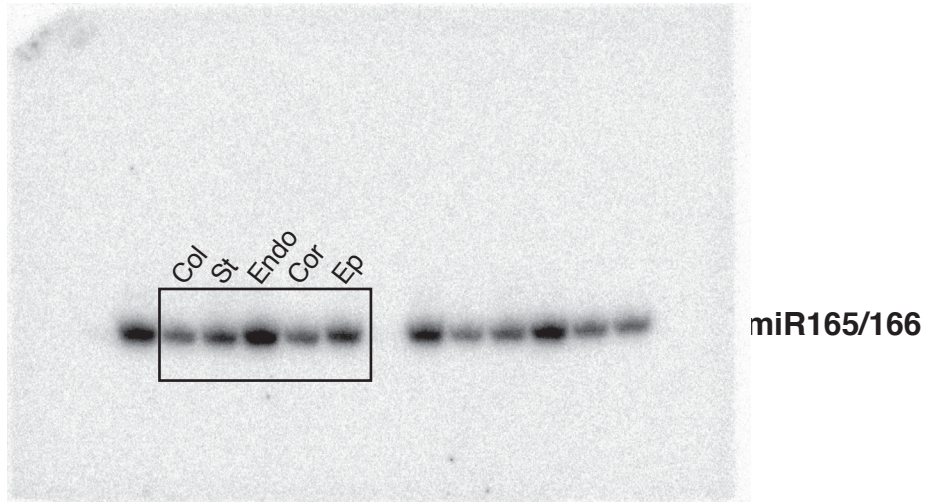

**D**

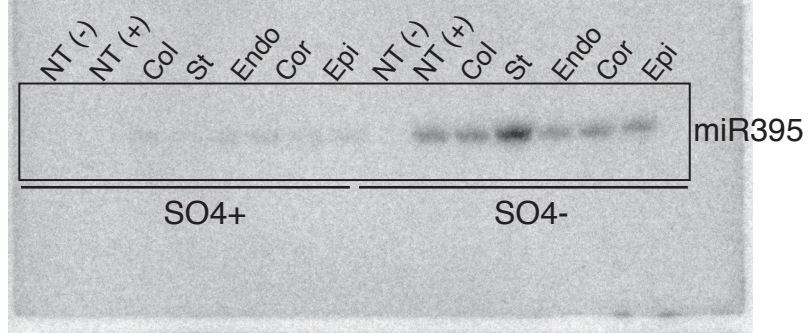

**Figure 6**

Supplement: EMBJ-38-e100754-s007.pdf [file EMBJ-38-e100754-s007.pdf]

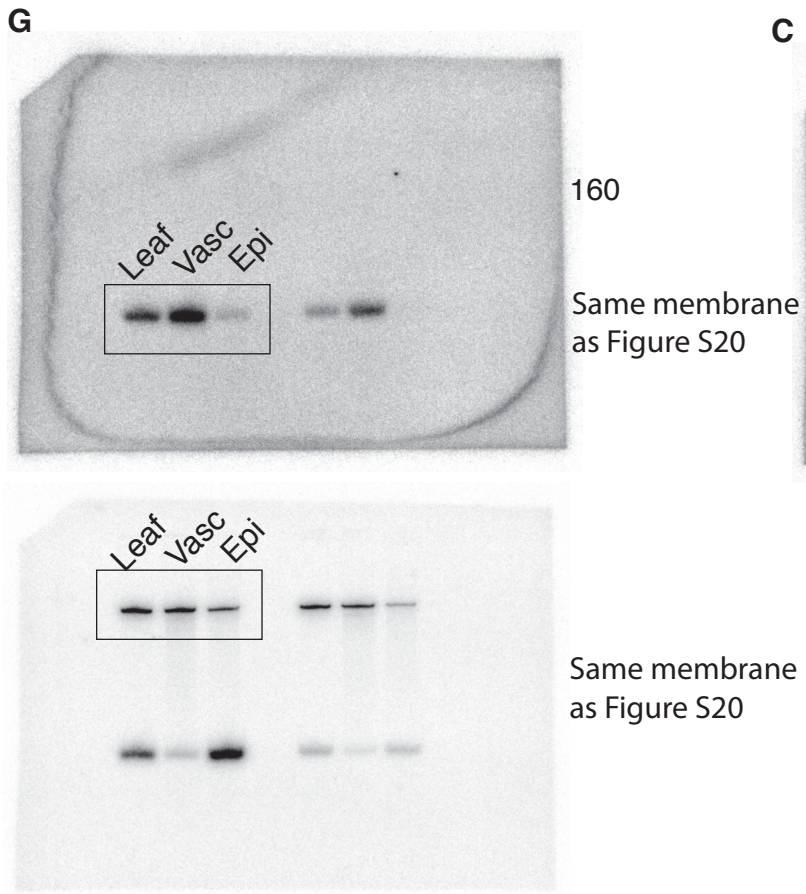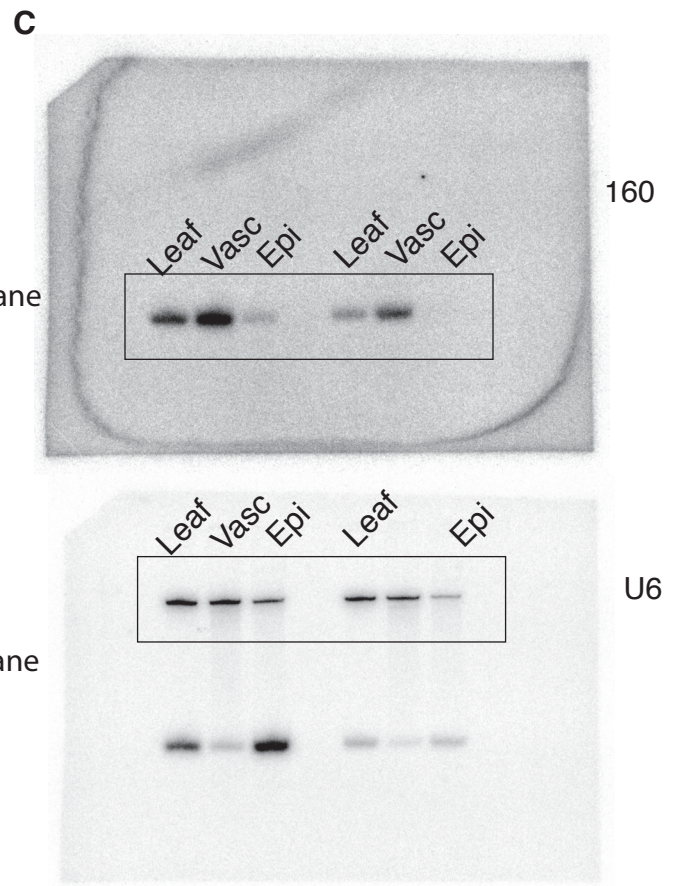

**Figure 7**

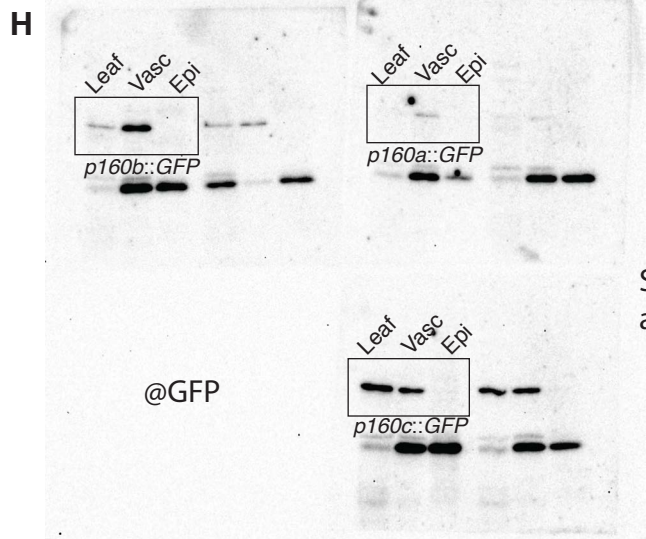

Same membrane as Figure S20

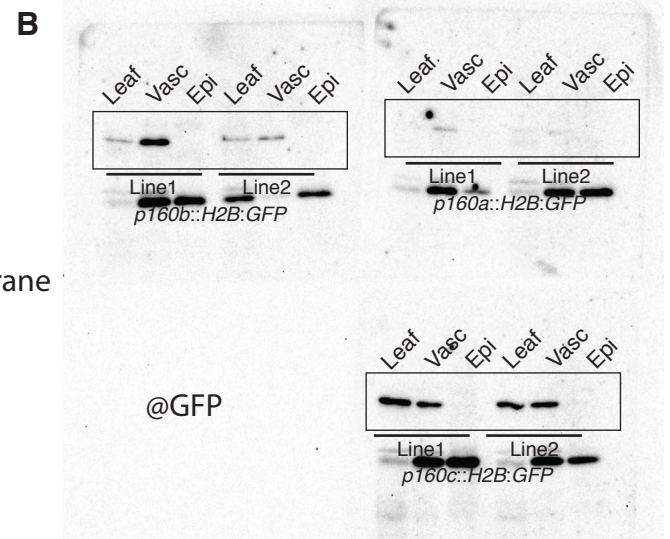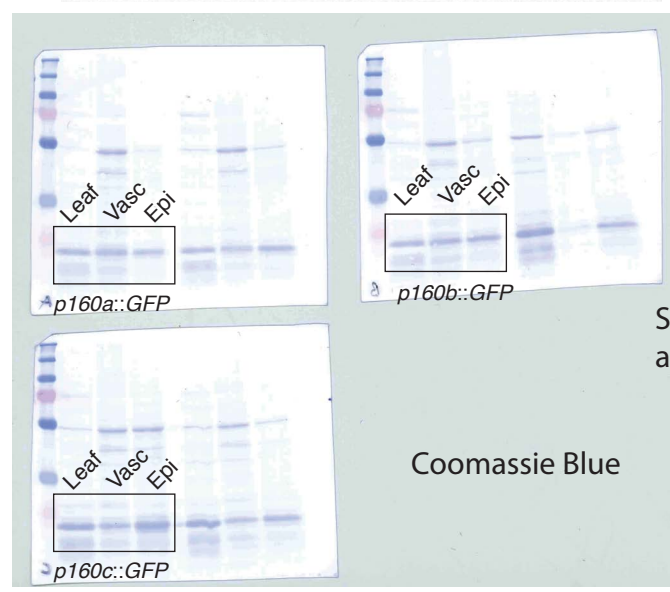

Same membrane as Figure S20

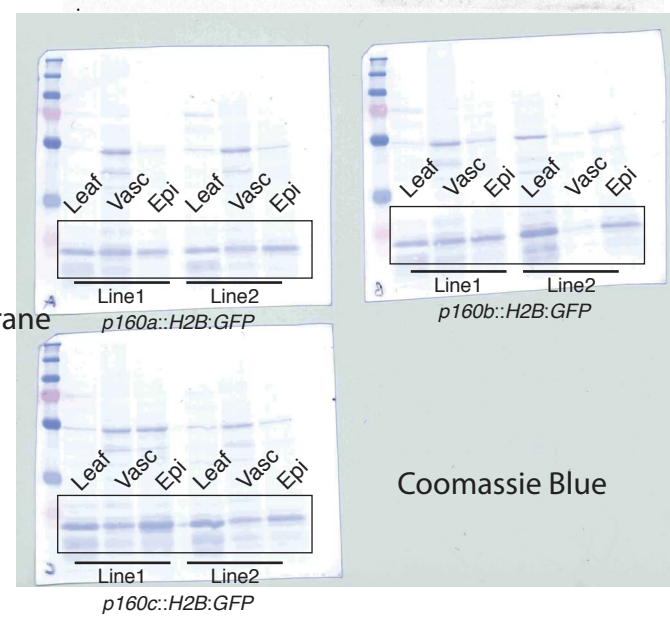

**Figure 7**

**Figure S20**

Supplement: EMBJ-38-e100754-s008.pdf [file EMBJ-38-e100754-s008.pdf]
